# Supplementary material for: Altered 3D chromatin structure permits inversional recombination at the IgH locus
Source: PubMed Central journal article supplement — Sci Adv. 2020 Aug 14;6(33):eaaz8850. doi: 10.1126/sciadv.aaz8850 (PMC7428332; doi:10.1126/sciadv.aaz8850), 2020-08-14
Supplement: aaz8850_SM.pdf [file aaz8850_SM.pdf]

[advances.sciencemag.org/cgi/content/full/6/33/eaaz8850/DC1](https://advances.sciencemag.org/cgi/content/full/6/33/eaaz8850/DC1)

## Supplementary Materials for

### **Altered 3D chromatin structure permits inversional recombination at the *IgH* locus**

Xiang Qiu, Fei Ma, Mingming Zhao, Yaqiang Cao, Lillian Shipp, Angela Liu, Arun Dutta, Amit Singh, Fatima Zohra Braikia, Supriyo De, William H. Wood III, Kevin G. Becker, Weiqiang Zhou, Hongkai Ji, Keji Zhao, Michael L. Atchison, Ranjan Sen\*

\*Corresponding author. Email: [senranja@grc.nia.nih.gov](mailto:senranja@grc.nia.nih.gov)

Published 14 August 2020, *Sci. Adv.* **6**, eaaz8850 (2020)

DOI: [10.1126/sciadv.aaz8850](https://doi.org/10.1126/sciadv.aaz8850)

#### **This PDF file includes:**

Figs. S1 to S6  
Tables S1 to S4

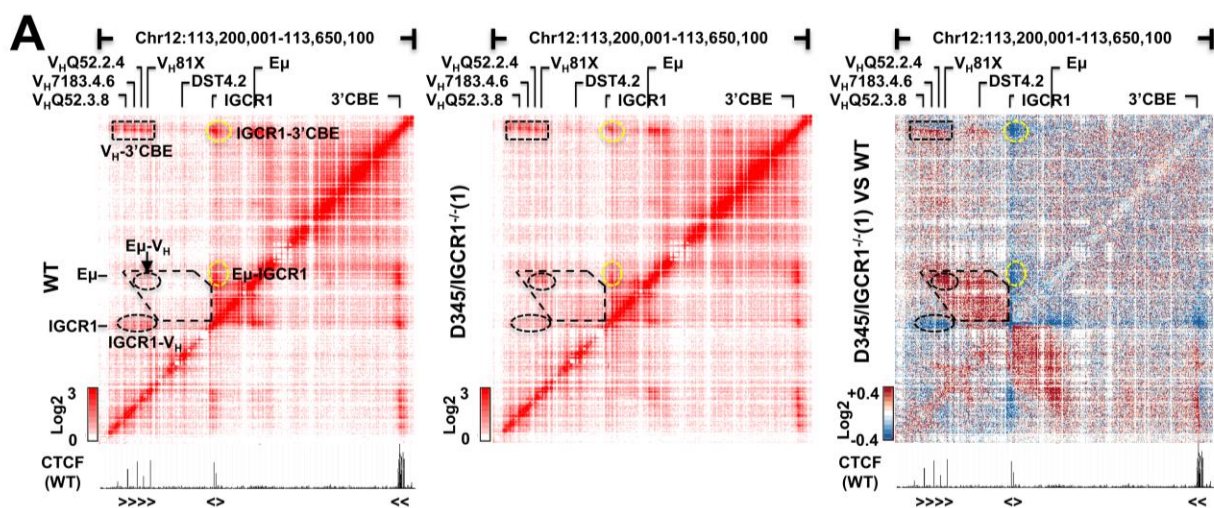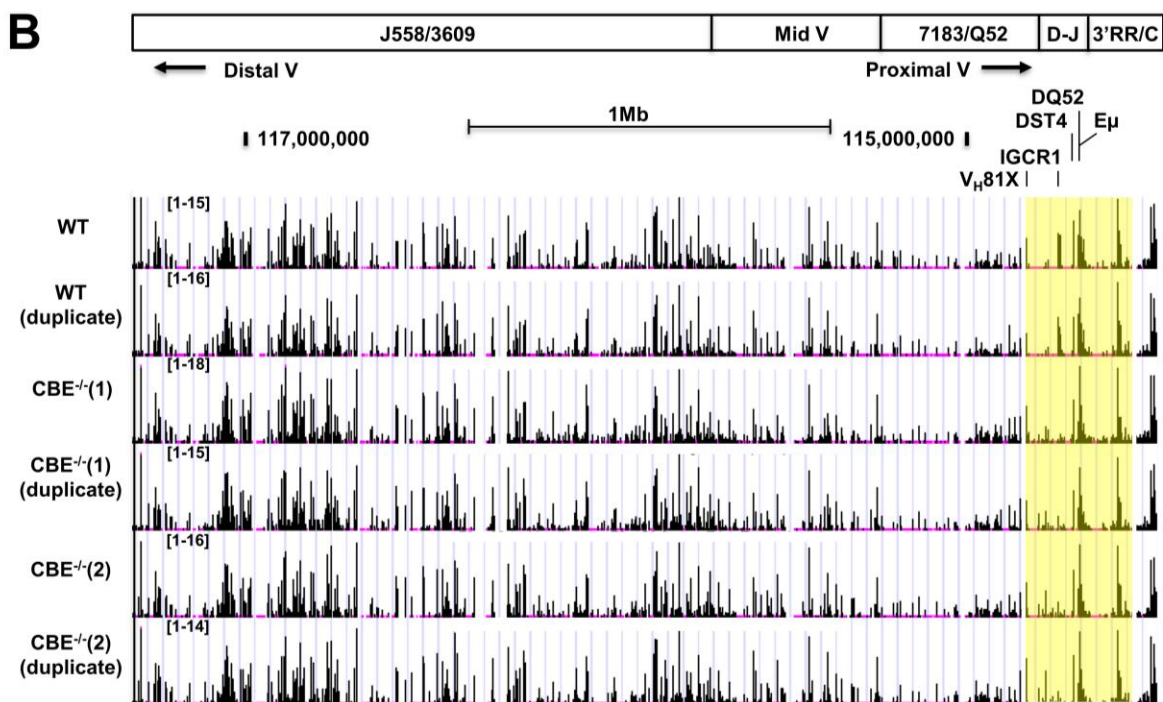

C

| Name                    | Chromatin 12 localization (mm9) |           | Log2 transformation |                |                        |                                    |                        |                                    | Adjusted p-value            |                             |                                                 |
|-------------------------|---------------------------------|-----------|---------------------|----------------|------------------------|------------------------------------|------------------------|------------------------------------|-----------------------------|-----------------------------|-------------------------------------------------|
|                         | Start                           | End       | WT                  | WT (duplicate) | CBE <sup>-/-</sup> (1) | CBE <sup>-/-</sup> (1) (duplicate) | CBE <sup>-/-</sup> (2) | CBE <sup>-/-</sup> (2) (duplicate) | WT & CBE <sup>-/-</sup> (1) | WT & CBE <sup>-/-</sup> (2) | CBE <sup>-/-</sup> (1) & CBE <sup>-/-</sup> (2) |
| 3'Cγ1                   | 114560190                       | 114560790 | 6.747               | 6.418          | 6.230                  | 6.739                              | 6.503                  | 6.467                              | 0.7527                      | 0.7850                      | 0.9987                                          |
| Eμ-DQ52                 | 114664638                       | 114670222 | 10.831              | 10.843         | 11.108                 | 10.881                             | 10.963                 | 10.830                             | 0.4498                      | 0.8124                      | 0.6797                                          |
| DST4                    | 114684249                       | 114684750 | 7.327               | 7.243          | 7.292                  | 7.244                              | 7.495                  | 7.561                              | 0.9337                      | 0.2431                      | 0.2310                                          |
| 5'DFL16.1               | 114719251                       | 114721083 | 8.741               | 8.594          | 7.327                  | 7.094                              | 7.160                  | 7.088                              | 0.0018                      | 0.0019                      | 0.7246                                          |
| IGCR1 (CBE2)            | 114723238                       | 114724090 | 7.874               | 7.765          | 4.882                  | 5.261                              | 5.262                  | 5.106                              | 0.0007                      | 0.0009                      | 0.6900                                          |
| IGCR1 (CBE1)            | 114725828                       | 114726376 | 7.429               | 7.548          | 4.786                  | 4.386                              | 4.353                  | 4.873                              | 0.0009                      | 0.0011                      | 0.9481                                          |
| DST4.2                  | 114763445                       | 114763776 | 3.509               | 3.531          | 4.786                  | 5.060                              | 5.317                  | 5.880                              | 0.0064                      | 0.0023                      | 0.0926                                          |
| V <sub>H</sub> 81X      | 114816190                       | 114816948 | 7.059               | 6.839          | 7.931                  | 7.922                              | 8.140                  | 8.020                              | 0.0057                      | 0.0044                      | 0.5063                                          |
| V <sub>H</sub> Q52.2.4  | 114825855                       | 114826672 | 6.348               | 6.418          | 7.633                  | 7.689                              | 7.530                  | 7.521                              | 0.0017                      | 0.0030                      | 0.5119                                          |
| V <sub>H</sub> 7183.4.6 | 114835183                       | 114835818 | 6.880               | 6.839          | 7.239                  | 7.171                              | 7.233                  | 7.268                              | 0.0934                      | 0.0815                      | 0.8360                                          |

**Fig. S1. Chromatin accessibility on WT and IGCR1-mutated *IgH* alleles.**

A. Normalized contact frequency for Capture Hi-C of WT (left) and IGCR1-deleted (middle) *IgH* alleles (corresponding to Fig. 1B). Interacting regions discussed in the text are highlighted within dashed lines. Difference interaction map between WT and IGCR1-deleted *IgH* alleles is shown on the right. Contacts that decrease (blue) or increase (red) on IGCR1-deleted alleles are indicated. Position and orientation of CTCF bound sites are indicated below heat map (47).

B. Schematic map of *IgH* locus is shown on the top. ATAC-Seq assays were carried out in duplicate using RAG2-deficient pro-B cell lines with WT or IGCR1-mutated ( $CBE^{-/}(1)$ ,  $CBE^{-/}(2)$ ) *IgH* alleles. The entire *IgH* locus is shown (chr12:114,452,000-117,310,000, mm9) after normalization and peak calling. The partial *IgH* locus (chr12:114,554,576-114,839,712, mm9) highlighted in yellow is provided in Fig. 1C.

C. Localization, and statistical analysis of ATAC peaks marked within colored rectangles in Fig. 1C. Differential analysis of peak was performed using limma (54) based on moderated t-tests. To adjust for multiple testing, *p*-values were adjusted using Benjamini-Hochberg (BH) procedure to obtain FDR. Adjusted *p*-values less than 0.01 were considered to be statistically different for ATAC peaks marked within green or red rectangles in Fig. 1C.

See also Fig. 1.

**A**

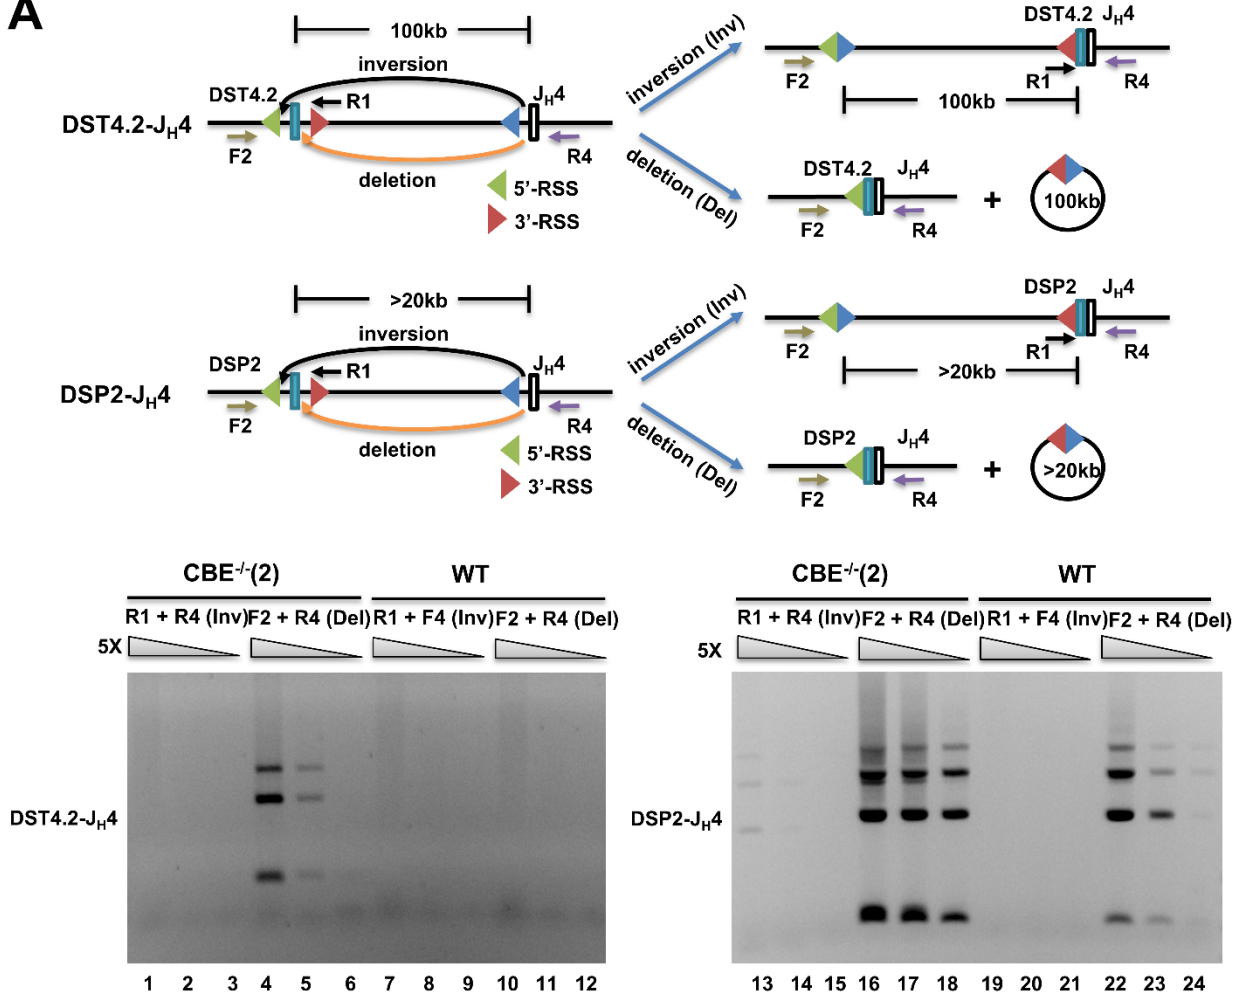

**B**

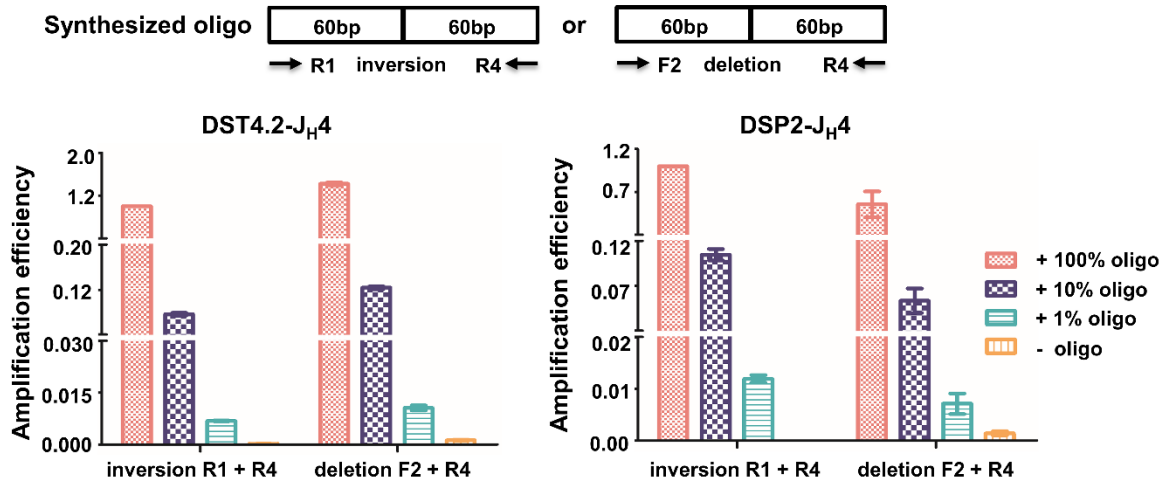

**Fig. S2. Recombination of DST4.2 and DSP2 on WT and IGCR1-mutated *IgH* alleles.**

A. Schematic representation of 5'- and 3'-RSS of DST4.2 or DSP2 recombining to J<sub>H</sub>4 gene segment by deletion (orange arrow) or inversion (black arrow), respectively (left). Locations and orientation of primers used to assay recombination are indicated, together with the 12-RSSs of DST4.2 or DSP2 (green and red triangles) and 23-RSS flanking J<sub>H</sub>4 gene segment (blue triangle). Products of each form of rearrangement are shown to the right. Signal-end junction by-products consisting of heptamer-heptamer fused RSSs are indicated as back-to-back triangles under inversional products. The corresponding region is deleted as an episome during deletional recombination (circle with fused triangles). Primer combinations specific for each kind of recombination are shown. Genomic DNA purified from IGCR1-mutated (CBE<sup>-/-</sup>(2)) and WT *IgH* allele containing pro-B cell lines expressing RAG2 were amplified using the indicated primer combinations to assay DST4.2-J<sub>H</sub>4 or DSP2-J<sub>H</sub>4 recombination by deletion or inversion (lanes 1-24). Each set of 3 lanes contain 5-fold increasing amounts of genomic DNA starting at 8 ng (lane 3, 6, 9, 15, 18, 21 and 24). Reaction products were separated by agarose gel electrophoresis and visualized by ethidium bromide staining. Data shown is representative of 2 biological replicate experiments.

B. Amplification efficiency of primers designed to test recombination products of inversional (R1+R4) or deletional (F2+R4) recombination of DST4.2 or DSP2 were tested with 120 nucleotide long synthetic recombination products, with 60 nucleotides around each primer (top). Realtime-PCR was carried out using indicated primers with serially diluted synthesized recombination products (100%, 10% and 1%) mixed with 200ng genomic DNA from a RAG2 deficient pro-B cell line. Reactions containing no synthetic recombination products served as the negative control (- oligo). Amplification efficiency is shown relative to the amount of PCR

product obtained in reactions containing 100% inversional oligo using primers R1 and R4. Data are shown as mean  $\pm$  SEM of three independent experiments.

See also Fig. 2, Table S4.

**A****Control 1 (293T)**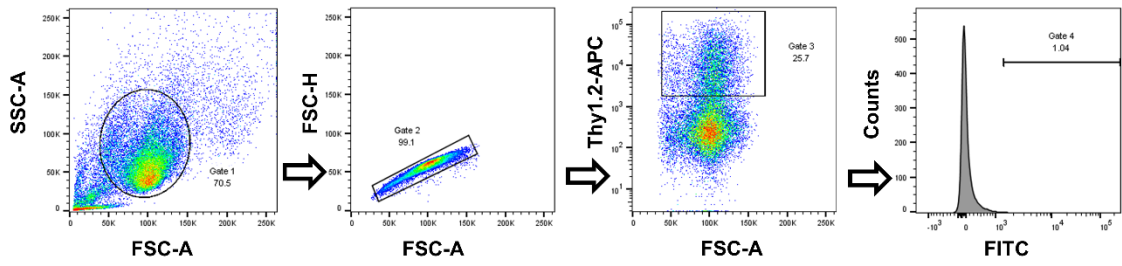**B**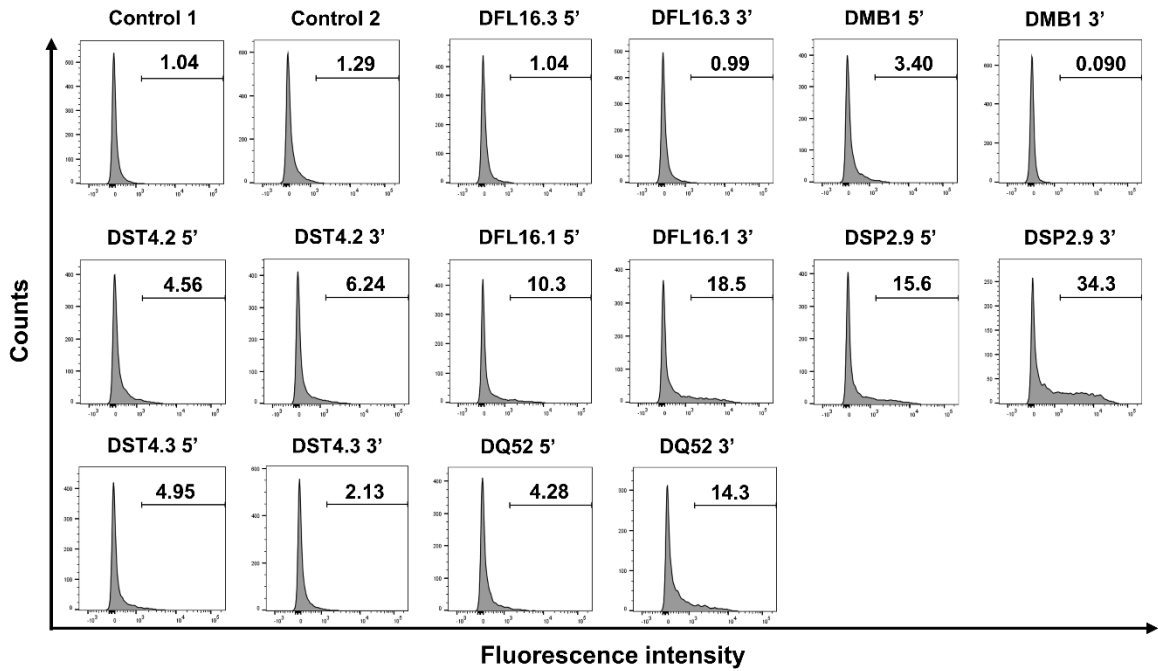**C****Control 1 (Pre-B cell line)**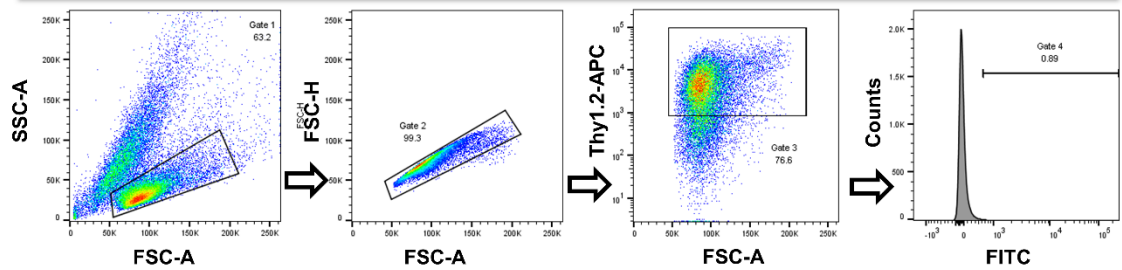



**Fig. S3. Fluorescence-activated cell sorting (FACS) analysis of D<sub>H</sub> RSS strength.**

A. FACS gating strategy and analysis of Control 1 is shown. 293T cells were co-transfected with recombination reporters and expression vectors for RAG1 and RAG2. Non-functional 12-RSS is indicated as Control 1. After two days in culture, Thy1.2 positive cells were gated from single and live cells, and used for analysis of GFP-expressing cells. GFP intensity within Thy1.2<sup>+</sup> populations was used as a measure of recombination efficiency.

B. 293T cells were co-transfected with recombination reporters and expression vectors for RAG1 and RAG2. Sequences of 12-RSSs are listed in Table S1. Control 2 is indicated as 293T cells transfected with recombination reporter (3'-RSS of DFL16.1) in the absence of RAG1/2. Average results of three independent experiments are shown in Fig. 2C and 2D.

C. A RAG1/2 expressing pre-B cell line was infected with recombination reporter retroviruses as described (29, 30). Non-functional 12-RSS is indicated as Control 1. After two days in culture, Thy1.2 positive cells were gated from single and live cells, and used for analysis of GFP intensity. GFP intensity within Thy1.2<sup>+</sup> populations was used as a measure of recombination efficiency.

See also Fig. 2, Table S1.

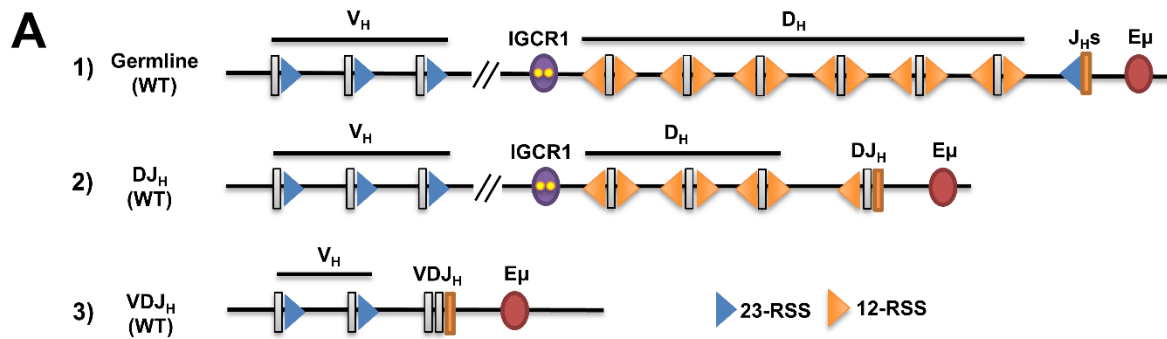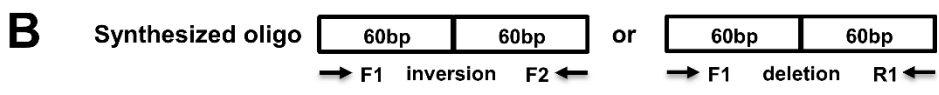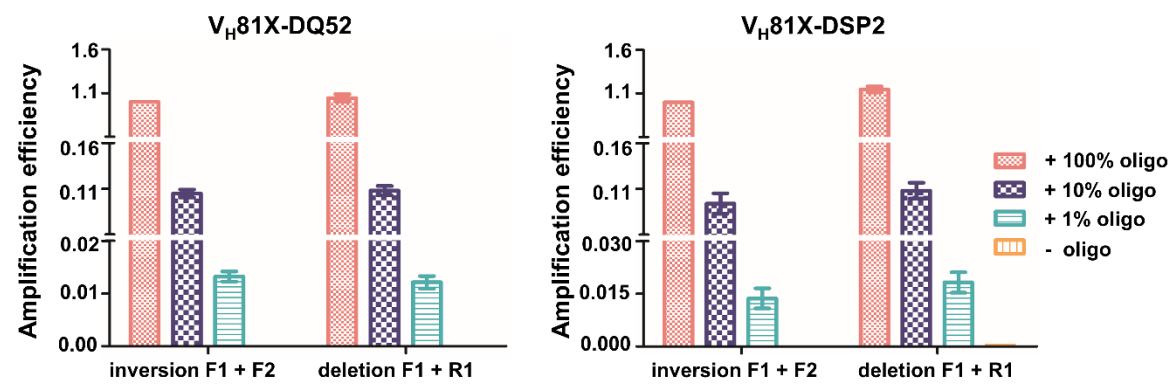

**C**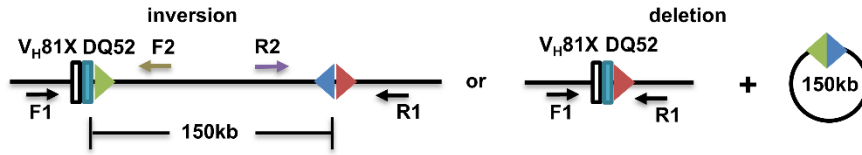**D**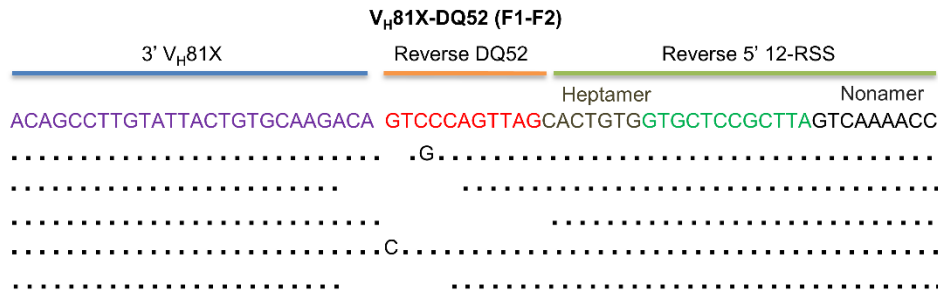**E**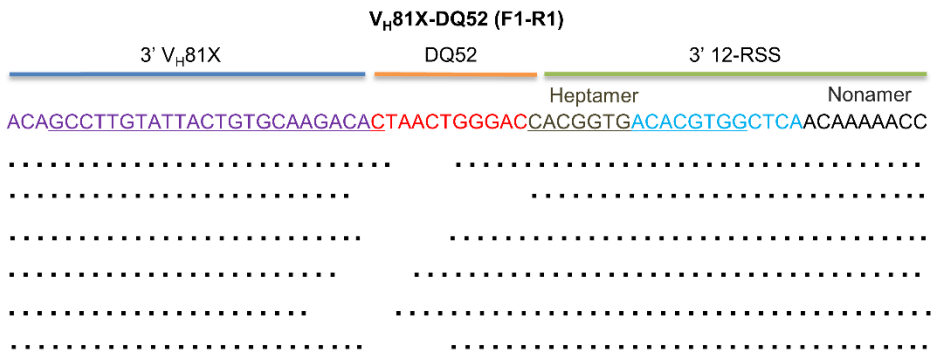**F**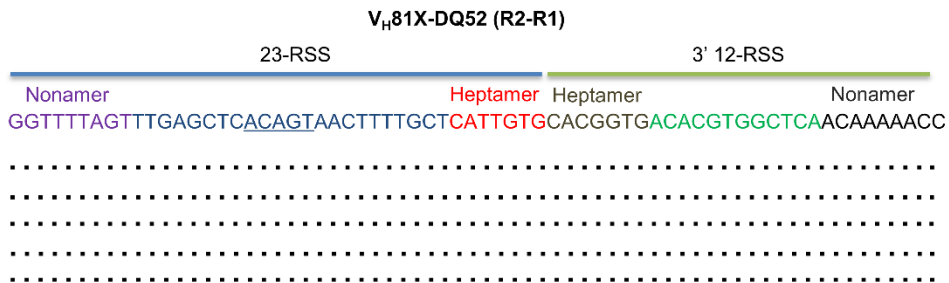

**G**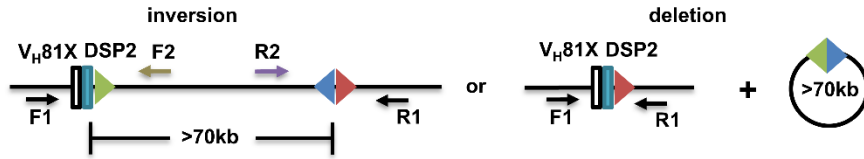**H**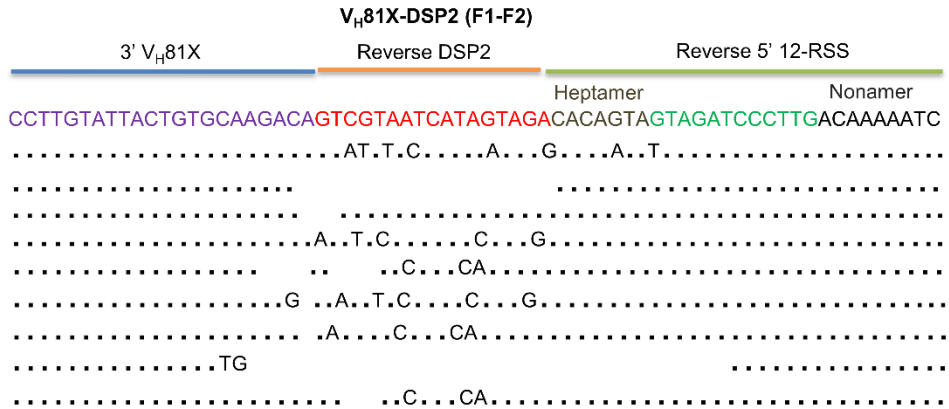**I**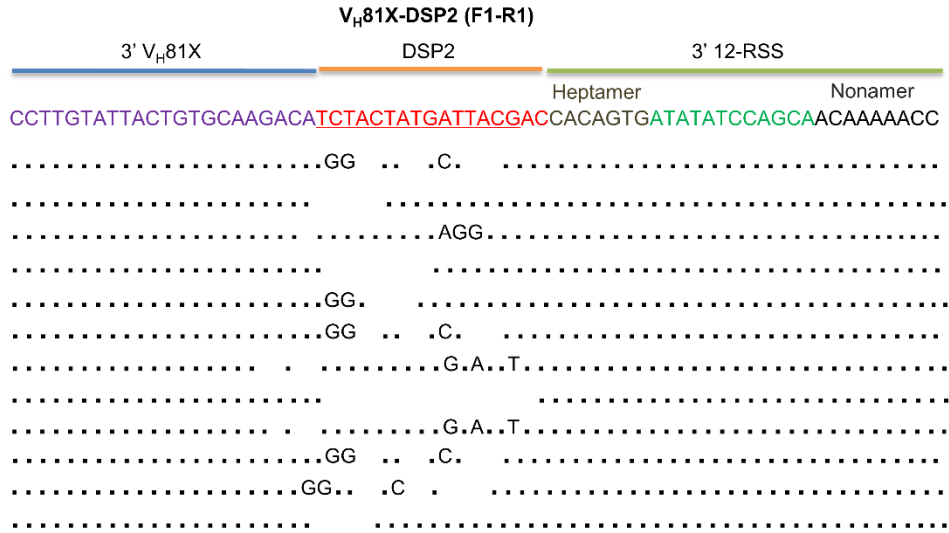**J**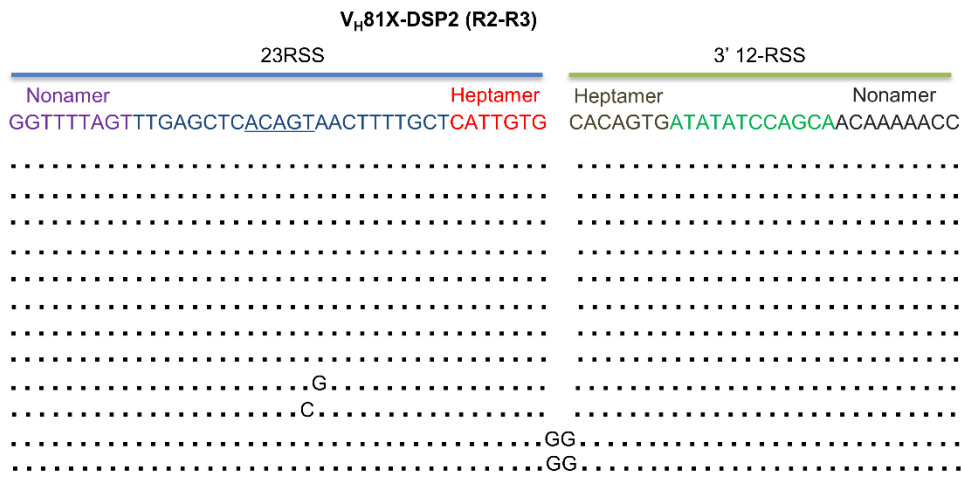

**Fig. S4. V<sub>H</sub>81X-DQ52 and V<sub>H</sub>81X-DSP2 recombination junction sequences.**

A. Schematic map of germline (lane 1), DJ<sub>H</sub> (lane 2) and VDJ<sub>H</sub> (lane 3) recombined WT *IgH* alleles. DJ<sub>H</sub> alleles can retain several unrearranged D<sub>H</sub> gene segments (lane 2). 5' of the DJ<sub>H</sub> junction is recombined to V<sub>H</sub> to delete germline D<sub>H</sub> gene segments and IGCR1 (lane 3). RSSs are indicated as colored triangles: 23-RSS (blue), 12-RSS (yellow). Recombination regulatory sequences E<sub>μ</sub> and IGCR1 are indicated as colored ovals.

B. Amplification efficiency of primers (V<sub>H</sub>81X-DQ52 and V<sub>H</sub>81X-DSP2) used to detect inversional or deletional recombination was tested with 120 nucleotide long synthetic recombination products, with 60 nucleotides around each primer (top). Realtime-PCR was carried out using indicated primers with serially diluted synthesized recombination products (100%, 10% and 1%) mixed with 200ng genomic DNA from a RAG2 deficient pro-B cell line and. Reactions containing no synthetic recombination products served as the negative control (– oligo). Amplification efficiency is shown relative to the amount of PCR product obtained in reactions containing 100% inversional oligo. Data are shown as mean ± SEM of three independent experiments.

C and G. Schematic representation of V<sub>H</sub>81X rearrangement to 5'- and 3'-RSS of DQ52 (C) or DSP2 (G) gene segment by inversion (left) or deletion (right) was described in Fig. 3A.

D-F and H-J. Genomic DNA purified from IGCR1-mutated pro-B cell line (CBE<sup>-/-</sup>(2)) was amplified with different primer combinations that identified inversional (D and H, using primers F1-F2) or deletional (E and I, using primers F1-R1) recombination products of V<sub>H</sub>81X and DQ52 or DSP2. Signal-end junctional sequences (F and J) were obtained after amplification with primers R2 and R1 or R3. Locations and orientation of primers used to assay recombination are indicated above the sequences. Purified amplicons were cloned into pGEM®-

T Vector, followed by sequencing. First line represents predicted junction sequence of V<sub>H</sub>81X-DQ52 or DSP2.2a recombination, followed by sequences of independently cloned junctions. DSP2.2a is one of DSP2 family gene segments. Dots identify the same sequence as the top line. Blanks and added nucleotides represent deletion and addition of nucleotides, respectively, during recombination.

See also Fig. 3, Table S4.

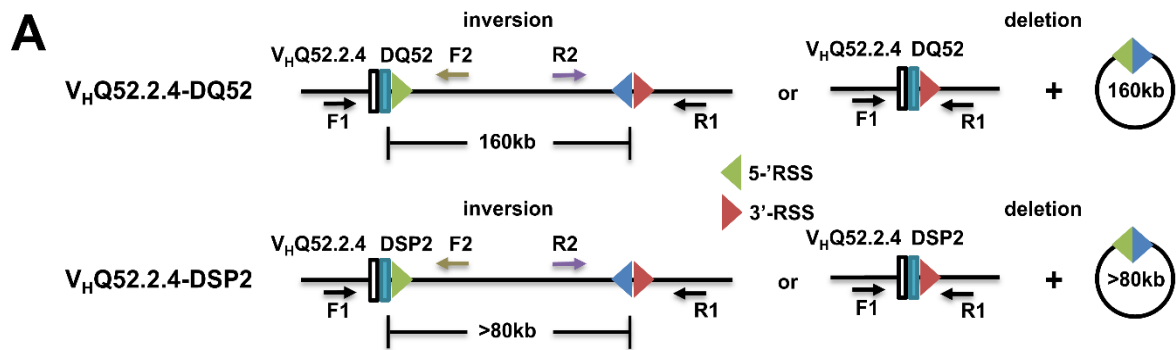

**B**

WT ACTATCCAGACACCATGGAGAGACGATTCATCATCT-----TCCTTGATGATTGACTACCAAACCT

CBE<sup>-1</sup>/C1<sup>-1</sup> #1 ACTATCCAGACACCATGGAGA TTGACTACCAAACCT

CBE<sup>-1</sup>/C1<sup>-1</sup> #2 ACTAT CCAAACCT

gRNA1 2137bp gRNA2

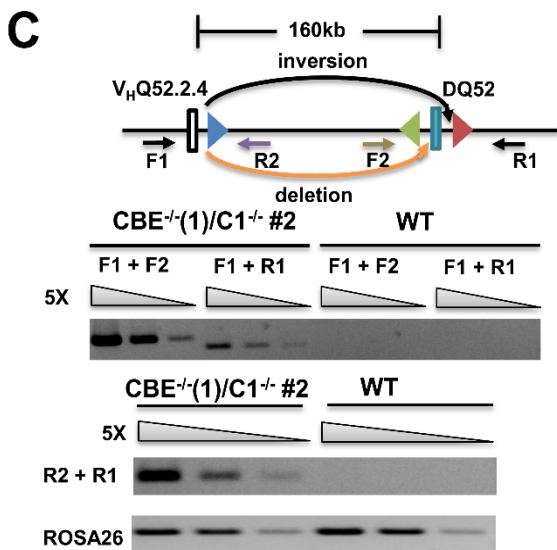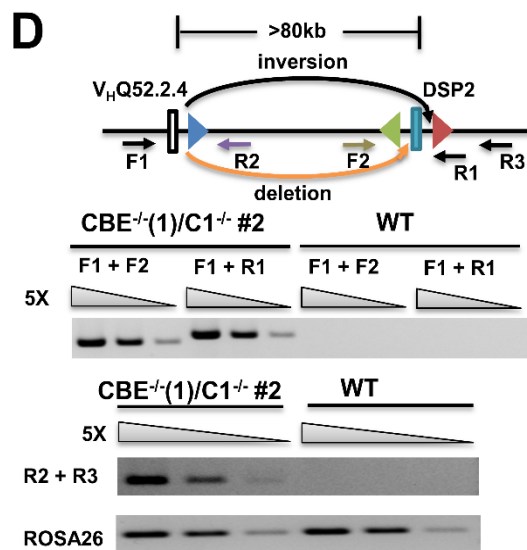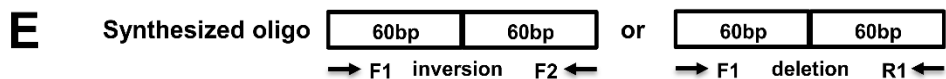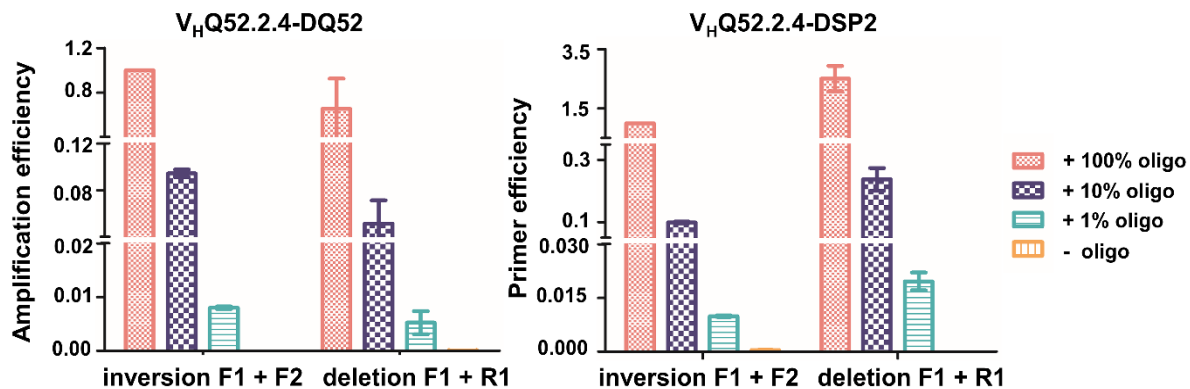







**Fig. S5. V<sub>H</sub>Q52.2.4-DQ52 and V<sub>H</sub>Q52.2.4-DSP2 recombination junction sequences.**

A. Schematic representation of V<sub>H</sub>Q52.2.4 rearrangement to 5'- and 3'-RSS of DQ52 (top) and DSP2 (bottom) gene segments by inversion or deletion, respectively. Locations and orientation of primers used to assay recombination are indicated. Products of each form of rearrangements are shown. Signal-end junction by-products consisting of heptamer-heptamer fused RSSs, are indicated as back-to-back triangles under inversional products. The corresponding region is deleted as an episome during deletional recombination (circle with fused triangles). Primer combinations specific for each kind of recombination are shown.

B. CBE<sup>-/-</sup>(1)/C1<sup>-/-</sup> #1 and CBE<sup>-/-</sup>(1)/C1<sup>-/-</sup> #2 are two different subclones derived from IGCR1-mutated pro-B cell line CBE<sup>-/-</sup>(1) with V<sub>H</sub>81X and CBE deletion using CRISPR/Cas9 (C1) (24).

Top line represents germline sequence around C1, followed by sequence of

CBE<sup>-/-</sup>(1)/C1<sup>-/-</sup> #1 and CBE<sup>-/-</sup>(1)/C1<sup>-/-</sup> #2. PAM, gRNA1 and gRNA2 sequences are indicated in red and blue, respectively.

C and D. Recombination of V<sub>H</sub>Q52.2.4-DQ52 or V<sub>H</sub>Q52.2.4-DSP2 in CBE<sup>-/-</sup>(1)/C1<sup>-/-</sup> #1 are shown in Fig. 5B and 5C. Recombination of V<sub>H</sub>Q52.2.4-DQ52 or V<sub>H</sub>Q52.2.4-DSP2 in CBE<sup>-/-</sup>(1)/C1<sup>-/-</sup> #2 are shown in part C and D, as described in Fig. 5.

E. Amplification efficiency analyses were carried out as described in Fig. S2B to assay inversion versus deletion for V<sub>H</sub>Q52.2.4-DQ52 (left) or V<sub>H</sub>Q52.2.4-DSP2 (right), respectively. Data are shown as mean ± SEM of three independent experiments.

F-K. Genomic DNA purified from IGCR1-mutated pro-B cell line with C1 deletion (CBE<sup>-/-</sup>(1)/C1<sup>-/-</sup> #1) was amplified with different primer combinations that identified inversional (F and I, using primers F1-F2) or deletional (G and J, using primers F1-R1) recombination products of V<sub>H</sub>Q52.2.4 and DQ52 or DSP2. Signal-end junctional sequences (H and K) were obtained after

amplification with primers R2 and R1 or R3. Locations and orientation of primers used to assay recombination are indicated above the sequences. Purified amplicons were cloned into pGEM®-T Vector, followed by sequencing. First line represents predicted junction sequence of V<sub>H</sub>Q52.2.4-DQ52 or DSP2.2a recombination, followed by sequences of independently cloned junctions. DSP2.2a is one of DSP2 family gene segments. Dots identify the same sequence as the top line. Blanks and added nucleotides represent deletion and addition of nucleotides, respectively, during recombination.

See also Fig. 5 and Table S4.

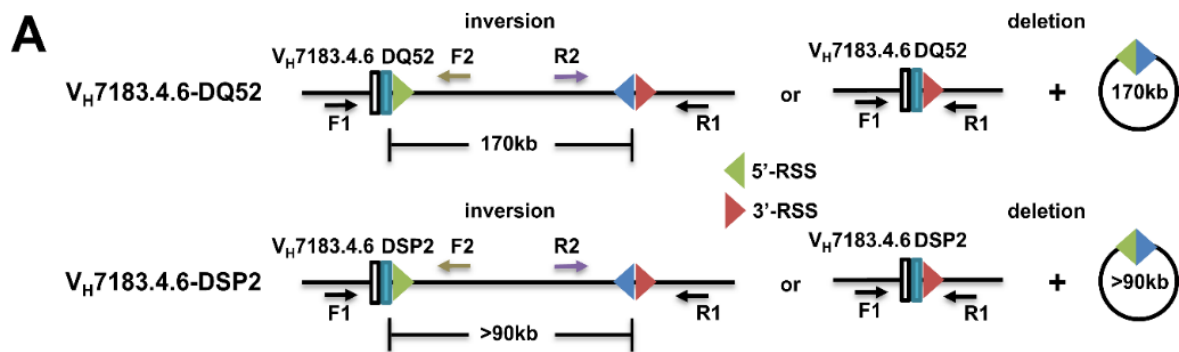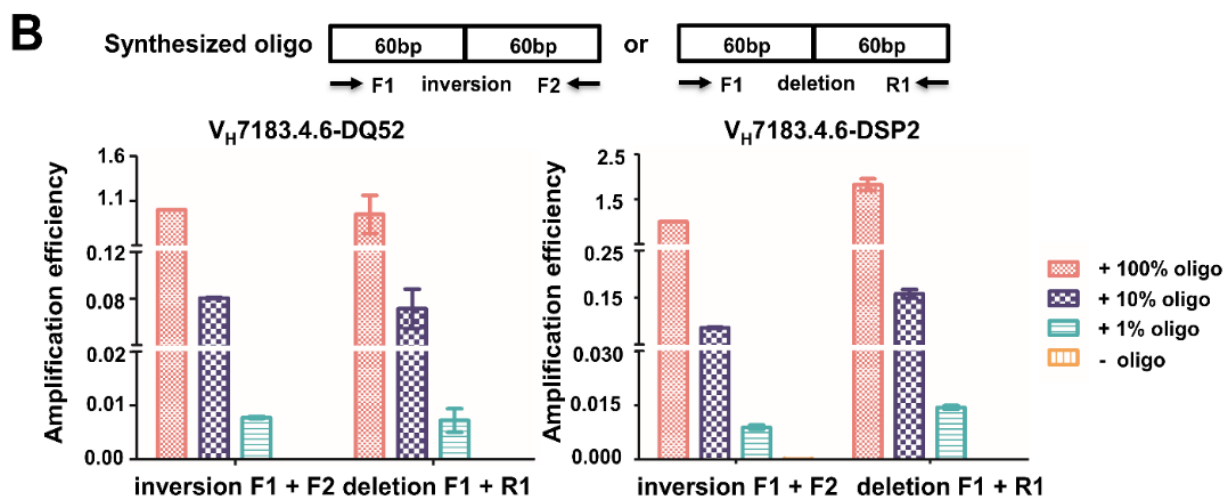

**C**

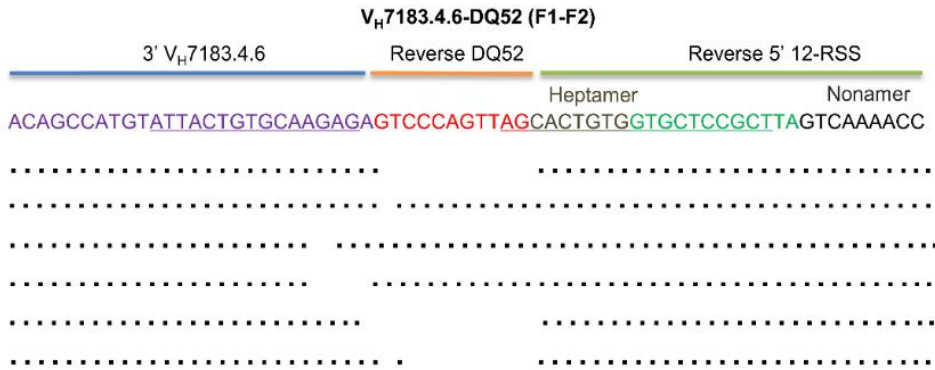

**D**

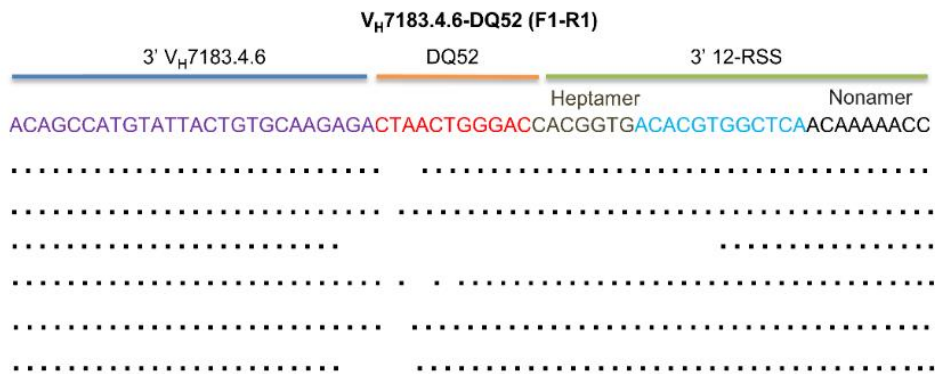

**E**

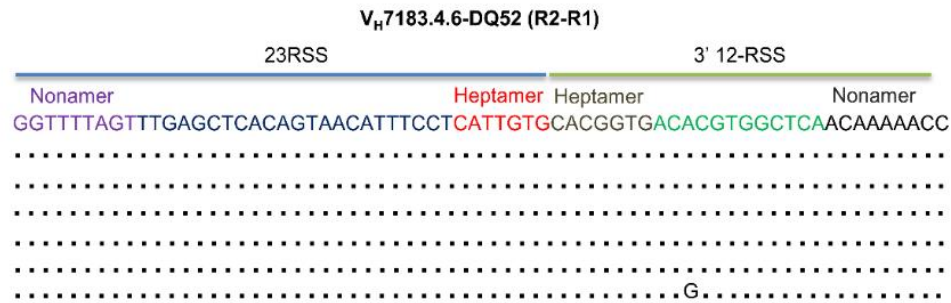



**Fig. S6. V<sub>H</sub>7183.4.6-DQ52 and V<sub>H</sub>7183.4.6-DSP2 recombination junction sequences.**

A. Schematic representation of V<sub>H</sub>7183.4.6 rearrangements to 5'- and 3'-RSS of DQ52 (top) and DSP2 (bottom) gene segments by inversion or deletion, respectively. Locations and orientation of primers used to assay recombination are indicated. Products of each form of rearrangements are shown. Signal-end junction by-products consisting of heptamer-heptamer fused RSSs, are indicated as back-to-back triangles under inversional products. The corresponding region is deleted as an episome during deletional recombination (circle with fused triangles). Primer combinations specific for each kind of recombination are shown.

B. Amplification efficiency analyses were carried out as described in Fig. S2B to assay inversion versus deletion for V<sub>H</sub>7183.4.6-DQ52 (left) or V<sub>H</sub>7183.4.6-DSP2 (right), respectively. Data are shown as mean ± SEM of three independent experiments.

C-H. Genomic DNA purified from IGCR1-mutated pro-B cell line with C1 and C2 deletion (CBE<sup>-/-</sup>(1)/C1<sup>-/-</sup> C2<sup>-/-</sup>) was amplified with different primer combinations that identified inversional (C and F, using primers F1-F2) or deletional (D and G, using primers F1-R1) recombination products of V<sub>H</sub>7183.4.6 and DQ52 or DSP2. Signal-end junctional sequences (E and H) were obtained after amplification with primers R2 and R1 or R3. Locations and orientation of primers used to assay recombination are indicated above the sequences. Purified amplicons were cloned into pGEM®-T Vector, followed by sequencing. First line represents predicted junction sequence of V<sub>H</sub>7183.4.6-DQ52 or DSP2.2a recombination, followed by sequences of independently cloned junctions. DSP2.2a is one of DSP2 family gene segments. Dots identify the same sequence as the top line. Blanks and added nucleotides represent deletion and addition of nucleotides, respectively, during recombination.

See also Fig. 5 and Table S4.

**Table S1. D<sub>H</sub> 12-RSS recombination information content (RIC) scores and strength.**

| D <sub>H</sub> genes | 12-RSS sequence               | RIC score         | RIC pass/fail |
|----------------------|-------------------------------|-------------------|---------------|
| DFL16.3              | cacagtagtagagcctttctcaaaaac   | -32.4731235371929 | PASS          |
|                      | cacaatggtgtatctagtagcaaaagt   | -37.456359861778  | PASS          |
| DMB1                 | cacagtgagagaggcagatactgaattc  | -33.8741979229379 | PASS          |
|                      | cacagtgatacagagcatccatggaaga  | -33.0860539045419 | PASS          |
| DST4.2               | cactgtgacagtaactgttcaaaatcc   | -27.8193402641352 | PASS          |
|                      | cactgtaagaaaagctcaaacaaaact   | -32.9230344632939 | PASS          |
| DFL16.1              | cacagtagtagatcccttcacaaaagc   | -15.3467711676282 | PASS          |
|                      | cacagtgtatatccatcagcaaaaacc   | -16.9821406634171 | PASS          |
| DSP2.9               | cacagtagtagatcccttgacaaaatc   | -15.0838006588257 | PASS          |
|                      | cacagtgtatatccagctacaaaacc    | -14.0122887731066 | PASS          |
| DST4.3               | cactgtgacaataccttgttcaaaatcc  | -28.776801859089  | PASS          |
|                      | cagctagggtgtcactgaaagaaaagc   | -50.5463936019675 | FAIL          |
| DQ52                 | cactgtggtgctccgcttagtcaaaaacc | -25.0935566077474 | PASS          |
|                      | cacggtgacacgtggctcaacaaaacc   | -20.724575878483  | PASS          |
| Control 1            | ggatccggatccggatccggatccggat  |                   |               |

Above table contains RSS sequences and predicted RIC scores by DNAGrab

(<http://www.itb.cnr.it/rss/analyze.html>) for D<sub>H</sub> (129 strain mice) genes. A PASS score for an RSS is RIC >-40.

| 12-RSS         | 293T (% of EGFP cells) |        |        | Pre-B cell line (% of EGFP cells) |       |
|----------------|------------------------|--------|--------|-----------------------------------|-------|
|                | Rep1                   | Rep2   | Rep3   | Rep1                              | Rep2  |
| Control 1      | 0.51                   | 1.04   | 0.850  | 0.89                              | 0.83  |
| Control 2      | 0.96                   | 1.29   | 0.990  |                                   |       |
| DFL16.3 5'-RSS | 1.610                  | 1.040  | 1.720  |                                   |       |
| DFL16.3 3'-RSS | 1.75                   | 0.99   | 1.730  |                                   |       |
| DMB1 5'-RSS    | 2.160                  | 3.400  | 3.000  |                                   |       |
| DMB1 3'-RSS    | 0.10                   | 0.09   | 0.062  | 0.82                              | 0.71  |
| DST4.2 5'-RSS  | 3.430                  | 4.560  | 6.130  | 4.83                              | 3.03  |
| DST4.2 3'-RSS  | 7.69                   | 6.24   | 7.000  | 6.21                              | 6.57  |
| DFL16.1 5'-RSS | 11.800                 | 10.300 | 10.700 | 17.60                             | 14.30 |
| DFL16.1 3'-RSS | 19.20                  | 18.50  | 20.300 | 21.60                             | 20.50 |
| DSP2.9 5'-RSS  | 17.800                 | 15.600 | 16.900 |                                   |       |
| DSP2.9 3'-RSS  | 36.70                  | 34.30  | 32.400 |                                   |       |
| DST4.3 5'-RSS  | 5.500                  | 4.950  | 4.980  |                                   |       |
| DST4.3 3'-RSS  | 1.01                   | 2.13   | 1.310  |                                   |       |
| DQ52 5'-RSS    | 3.140                  | 4.280  | 3.020  |                                   |       |
| DQ52 3'-RSS    | 15.90                  | 14.30  | 15.700 |                                   |       |

Rep stands for replication.



**Table S2. Deep sequencing results with DQ52 as bait.**

| Sample<br>(BARCODE)                       | Del<br>(raw reads) | Del<br>(percentage) | Inv<br>(raw reads) | Inv<br>(percentage) |
|-------------------------------------------|--------------------|---------------------|--------------------|---------------------|
| RAG2 <sup>-/-</sup> Rep1<br>(CGCATTA)     | 106420             | 99.97463526%        | 27                 | 0.025364736%        |
| RAG2 <sup>-/-</sup> Rep2<br>(CTTCGCGC)    | 85852              | 99.96274044%        | 32                 | 0.037259559%        |
| RAG2 <sup>-/-</sup> average               | 96136              | 99.96868785%        | 30                 | 0.031312147%        |
| CBE <sup>-/-</sup> (1) Rep1<br>(AACACCTA) | 754213             | 67.78096216%        | 358508             | 32.21903784%        |
| CBE <sup>-/-</sup> (1) Rep2<br>(ACTAACTG) | 525475             | 73.57728643%        | 188706             | 26.42271357%        |
| CBE <sup>-/-</sup> (1) average            | 639844             | 70.6791243%         | 273607             | 29.3208757%         |
| CBE <sup>-/-</sup> (2) Rep1<br>(ATCGCCAG) | 485834             | 64.9904287%         | 261713             | 35.0095713%         |
| CBE <sup>-/-</sup> (2) Rep2<br>(CATTCCAA) | 513956             | 63.36882209%        | 297099             | 36.63117791%        |
| CBE <sup>-/-</sup> (2) average            | 499895             | 64.17962539%        | 279406             | 35.82037461%        |

Del, Inv and Rep stand for deletion, inversion and replication, respectively.

**Table S3. Deep sequencing results with DSP2 as bait.**

| Sample<br>(BARCODE)                       | Del<br>(raw reads) | Del<br>(percentage) | Inv<br>(raw reads) | Inv<br>(percentage) |
|-------------------------------------------|--------------------|---------------------|--------------------|---------------------|
| RAG2 <sup>-/-</sup> Rep1<br>(CGAACTGT)    | 1154               | 100%                | 0                  | 0%                  |
| RAG2 <sup>-/-</sup> Rep2<br>(CTCTGTCT)    | 803                | 100%                | 0                  | 0%                  |
| RAG2 <sup>-/-</sup> average               | 979                | 100%                | 0                  | 0%                  |
| CBE <sup>-/-</sup> (1) Rep1<br>(CTTAAGAT) | 5276               | 90.68408388%        | 542                | 9.315916122%        |
| CBE <sup>-/-</sup> (1) Rep2<br>(GCAAGTAG) | 9842               | 91.29023282%        | 939                | 8.709767183%        |
| CBE <sup>-/-</sup> (1) average            | 7559               | 90.98715835%        | 741                | 9.012841653%        |
| CBE <sup>-/-</sup> (2) Rep1<br>(ATATAGGA) | 25446              | 92.22572578%        | 2145               | 7.77427422%         |
| CBE <sup>-/-</sup> (2) Rep2<br>(CACGTGTT) | 29915              | 94.01615387%        | 1904               | 5.98384613%         |
| CBE <sup>-/-</sup> (2) average            | 27681              | 93.12093983%        | 2025               | 6.879060175%        |

Del, Inv and Rep stand for deletion, inversion and replication, respectively.

**Table S4. Primer list.**

| cDNA real-time PCR                    |                                 |           |
|---------------------------------------|---------------------------------|-----------|
| Name                                  | Sequence (5'-3')                | Reference |
| DST4.2--F                             | ACAAGTTACTGTCACAGTGGGC          |           |
| DST4.2-R                              | ACACAAAGCCAGAAAGGGAATAG         |           |
| 3'DST4.2-F                            | ACAGGCAGATAGGATCAGTCTT          |           |
| 3'DST4.2-R                            | AGGGGTAGTATGGTGTCTGTTA          |           |
| DQ52-F                                | TGGTGCAAGGTTTTGACTAAGC          | (5)       |
| DQ52-R                                | CCAAACAGAGGGTTTTTGTGAG          | (5)       |
| $\gamma$ -actin-F                     | GGTGTCCGGAGGCACTCTT             | (5)       |
| $\gamma$ -actin-R                     | TGAAAGTGGTCTCATGGATACCA         | (5)       |
| E $\mu$ -F                            | AATACCCGAAGCATTTACAGTGACT       | (24)      |
| E $\mu$ -R                            | AAGATTTGTGAAGCCGTTTTGACCA       | (24)      |
| DJ/VD recombination assay             |                                 |           |
| DST4.2-F (P2)<br>(Fig.2)              | ACTCAGCAGGAAGGCTGTGAAGTC        |           |
| DST4.2-R (P3)<br>(Fig. 2)             | ATAAAGGACTTGATATTCAGGAGC        |           |
| V <sub>H</sub> 81X-F (P1)<br>(F1)     | CTGAAACTCTCCTGTGAATCCAA         | (24)      |
| DSP2-F<br>(P4)(F2)<br>(Fig, 2-3)      | ATGGCCCCTGACACTCTGCACTGCTA      | (40)      |
| J <sub>H</sub> 4-R                    | GGGTCTAGACTCTCAGCCGGCTCCCTCAGGG | (40)      |
| ROSA26-F                              | AAAGTCGCTCTGAGTTGTTAT           |           |
| ROSA26-R                              | GGAGCGGGAGAAATGGATATG           |           |
| DQ52-F (F2)<br>(Fig. 3 and 5)         | GCGACTGTTTTGAGAGAAATCATTG       | (40)      |
| DQ52-F (R1)<br>(Fig. 3 and 5)         | CATCCACCCTTCTGATGCTTGCATT       | (8)       |
| V <sub>H</sub> 81X-R (R2)<br>(Fig. 3) | GGCTGGTGTCTGGTCTACCATT          |           |
| DSP2-R1<br>(Fig. 3 and 5)             | TGGGTTTTTGTGCTGGATATATC         | (40)      |
| DSP2-R3<br>(Fig. 3 and 5)             | TAGTGTGCTTTCACCTGTCTGTG         |           |
| V <sub>H</sub> Q52.2.4-F1<br>(Fig. 5) | AGCTCACACTAAGCTGAGAAGCT         |           |

|                                        |                                                                                                                                        |  |
|----------------------------------------|----------------------------------------------------------------------------------------------------------------------------------------|--|
| V <sub>H</sub> Q52.2.4-R2<br>(Fig. 5)  | TTGCAGCTCTGTAGGATGAACAA                                                                                                                |  |
| V <sub>H</sub> 7183.4.6-F1<br>(Fig. 5) | GGAGGCCGGTCCTGGATTCGAGTT                                                                                                               |  |
| V <sub>H</sub> 7183.4.6-R2<br>(Fig. 5) | AATGCATCAGTAGGACAGAGTAC                                                                                                                |  |
| Synthesized oligo                      |                                                                                                                                        |  |
| DST4.2-F2-<br>J <sub>H</sub> 4         | ACTCAGCAGGAAGGCTGTGAAGTCTCTGACAGGATTT<br>TGAACAAGTACTGTACAGTGGAGCATTGCAGACTA<br>ATCTTGGATATTTGTCCCTGAGGGAGCCGGCTGAGAG<br>TCTAGACCC     |  |
| DST4.2-F2-<br>J <sub>H</sub> 4 (R)     | GGGTCTAGACTCTCAGCCGGCTCCCTCAGGGACAAAT<br>ATCCAAGATTAGTCTGCAATGCTCCACTGTGACAGTA<br>ACTTGTTCAAATCCTGTCAGAGACTTCACAGCCTTCC<br>TGCTGAGT    |  |
| DST4.2-R1-<br>J <sub>H</sub> 4         | ATAAAGGACTTGATATTCAGGAGCACCTTGCTGGTTG<br>GGTATGTATACACATATACATGCAGCATTGCAGACTA<br>ATCTTGGATATTTGTCCCTGAGGGAGCCGGCTGAGAG<br>TCTAGACCC   |  |
| DST4.2-R1-<br>J <sub>H</sub> 4<br>(R)  | GGGTCTAGACTCTCAGCCGGCTCCCTCAGGGACAAAT<br>ATCCAAGATTAGTCTGCAATGCTGCATGTATATGTGTA<br>TACATACCCAACCAGCAAGGTGCTCCTGAATATCAAG<br>TCCTTTAT   |  |
| DSP2-F2-J <sub>H</sub> 4               | ATGGCCCCTGACACTCTGCACTGCTACCTCTGGCCCCA<br>CCAGACCATGTTCCCTGCATAACAGCATTGCAGACTAA<br>TCTTGGATATTTGTCCCTGAGGGAGCCGGCTGAGAGT<br>CTAGACCC  |  |
| DSP2-F2-J <sub>H</sub> 4<br>(R)        | GGGTCTAGACTCTCAGCCGGCTCCCTCAGGGACAAAT<br>ATCCAAGATTAGTCTGCAATGCTGTTATGCAGGAACA<br>TGGTCTGGTGGGGCCAGAGGTAGCAGTGCAGAGTGTG<br>AGGGGCCAT   |  |
| DSP2-R1-J <sub>H</sub> 4               | TGGGTTTTTGTGTTGCTGGATATATCACTGTGGTCGTAAT<br>CATAGTAGACACAGTAGTAGATAGCATTGCAGACTAA<br>TCTTGGATATTTGTCCCTGAGGGAGCCGGCTGAGAGT<br>CTAGACCC |  |
| DSP2-R1-J <sub>H</sub> 4<br>(R):       | GGGTCTAGACTCTCAGCCGGCTCCCTCAGGGACAAAT<br>ATCCAAGATTAGTCTGCAATGCTATCTACTACTGTGTC<br>TACTATGATTACGACCACAGTGATATATCCAGCAACA<br>AAAACCCA   |  |
| V <sub>H</sub> 81X-DSP2-<br>F2         | CTGAAACTCTCCTGTGAATCCAATGAATACGAATTCCC<br>TTCCCATGACATGTCTTGGGTCGTTATGCAGGAACATG<br>GTCTGGTGGGGCCAGAGGTAGCAGTGCAGAGTGTGTCAG<br>GGGCCAT |  |

|                                    |                                                                                                                                       |  |
|------------------------------------|---------------------------------------------------------------------------------------------------------------------------------------|--|
| V <sub>H</sub> 81X-DSP2-F2 (R):    | ATGGCCCCTGACACTCTGCACTGCTACCTCTGGCCCCA<br>CCAGACCATGTTTCCTGCATAACGACCCAAGACATGTC<br>ATGGGAAGGGAATTCGTATTCATTGGATTCACAGGAG<br>AGTTTCAG |  |
| V <sub>H</sub> 81X-DSP2-R1         | CTGAAACTCTCCTGTGAATCCAATGAATACGAATTCCC<br>TTCCCATGACATGTCTTGGGTCATCTACTACTGTGTCT<br>ACTATGATTACGACCACAGTGATATATCCAGCAACAA<br>AAACCCA  |  |
| V <sub>H</sub> 81X-DSP2-R1 (R)     | TGGGTTTTTGTGCTGGATATATCACTGTGGTCGTAAT<br>CATAGTAGACACAGTAGTAGATGACCCAAGACATGTC<br>ATGGGAAGGGAATTCGTATTCATTGGATTCACAGGAG<br>AGTTTCAG   |  |
| V <sub>H</sub> 81X-DQ52-F2:        | CTGAAACTCTCCTGTGAATCCAATGAATACGAATTCCC<br>TTCCCATGACATGTCTTGGGTCCTCCCAATCTGCCAGT<br>CATCTCTTGAGTCAGGGACCAATGATTTCTCTCAAAC<br>AGTCGC   |  |
| V <sub>H</sub> 81X-DQ52-F 2 (R)    | GCGACTGTTTTGAGAGAAATCATTGGTCCCTGACTCA<br>AGAGATGACTGGCAGATTGGGGAGACCCAAGACATGT<br>CATGGGAAGGGAATTCGTATTCATTGGATTCACAGGA<br>GAGTTTCAG  |  |
| V <sub>H</sub> 81X-DQ52-R1         | CTGAAACTCTCCTGTGAATCCAATGAATACGAATTCCC<br>TTCCCATGACATGTCTTGGGTCCTGTGGACAGGTCTTA<br>GATGGGGAAAGAATGAGCAAATGCAAGCATCAGAAG<br>GGTGGATG  |  |
| V <sub>H</sub> 81X-DQ52-R 1 (R)    | CATCCACCCTTCTGATGCTTGCATTTGCTCATTCTTTCC<br>CCATCTAAGACCTGTCCACAGGACCCAAGACATGTCA<br>TGGGAAGGGAATTCGTATTCATTGGATTCACAGGAGA<br>GTTTCAG  |  |
| V <sub>H</sub> Q52.2.4-DSP2-F2     | AGCTCACACTAAGCTGAGAAGCTCCATCCTCTTCTCAT<br>AGAGCCTCCATCAGAGCATGGCGTTATGCAGGAACAT<br>GGTCTGGTGGGGCCAGAGGTAGCAGTGCAGAGTGTCA<br>GGGGCCAT  |  |
| V <sub>H</sub> Q52.2.4-DSP2-F2 (R) | ATGGCCCCTGACACTCTGCACTGCTACCTCTGGCCCCA<br>CCAGACCATGTTTCCTGCATAACGCCATGCTCTGATGG<br>AGGCTCTATGAGAAGAGGATGGAGCTTCTCAGCTTAG<br>TGTGAGCT |  |
| V <sub>H</sub> Q52.2.4-DSP2-R1     | AGCTCACACTAAGCTGAGAAGCTCCATCCTCTTCTCAT<br>AGAGCCTCCATCAGAGCATGGCATCTACTACTGTGTCT<br>ACTATGATTACGACCACAGTGATATATCCAGCAACAA<br>AAACCCA  |  |
| V <sub>H</sub> Q52.2.4-DSP2-R1 (R) | TGGGTTTTTGTGCTGGATATATCACTGTGGTCGTAAT<br>CATAGTAGACACAGTAGTAGATGCCATGCTCTGATGG<br>AGGCTCTATGAGAAGAGGATGGAGCTTCTCAGCTTAG<br>TGTGAGCT   |  |
| V <sub>H</sub> Q52.2.4-DQ52-F2     | AGCTCACACTAAGCTGAGAAGCTCCATCCTCTTCTCAT<br>AGAGCCTCCATCAGAGCATGGCTCCCAATCTGCCAG                                                        |  |

|                                         |                                                                                                                                        |  |
|-----------------------------------------|----------------------------------------------------------------------------------------------------------------------------------------|--|
|                                         | TCATCTCTTGAGTCAGGGACCAATGATTTCTCTCAAAA<br>CAGTCGC                                                                                      |  |
| V <sub>H</sub> Q52.2.4-<br>DQ52-F2 (R)  | GCGACTGTTTTGAGAGAAATCATTGGTCCCTGACTCA<br>AGAGATGACTGGCAGATTGGGGAGCCATGCTCTGATG<br>GAGGCTCTATGAGAAGAGGATGGAGCTTCTCAGCTTA<br>GTGTGAGCT   |  |
| V <sub>H</sub> Q52.2.4-<br>DQ52-R1      | AGCTCACACTAAGCTGAGAAGCTCCATCCTCTTCTCAT<br>AGAGCCTCCATCAGAGCATGGCCTGTGGACAGGTCTT<br>AGATGGGGAAAGAATGAGCAAATGCAAGCATCAGAA<br>GGGTGGATG   |  |
| V <sub>H</sub> Q52.2.4-<br>DQ52-R1 (R)  | CATCCACCCTTCTGATGCTTGCATTTGCTCATTCTTCC<br>CCATCTAAGACCTGTCCACAGGCCATGCTCTGATGGA<br>GGCTCTATGAGAAGAGGATGGAGCTTCTCAGCTTAGT<br>GTGAGCT    |  |
| V <sub>H</sub> 7183.4.6-<br>DSP2-F2     | GGAGGCCGGTCCTGGATTCGAGTTCCTCACATTCAGT<br>GATGAGCACTGAACACGGACCCCGTTATGCAGGAACA<br>TGGTCTGGTGGGGCCAGAGGTAGCAGTGCAGAGTGTC<br>AGGGGCCAT   |  |
| V <sub>H</sub> 7183.4.6-<br>DSP2-F2 (R) | ATGGCCCCTGACACTCTGCACTGCTACCTCTGGCCCCA<br>CCAGACCATGTTCCCTGCATAACGGGGTCCGTGTTTCAGT<br>GCTCATCACTGAATGTGAGGAACTCGAATCCAGGACC<br>GGCCTCC |  |
| V <sub>H</sub> 7183.4.6-<br>DSP2-R1     | GGAGGCCGGTCCTGGATTCGAGTTCCTCACATTCAGT<br>GATGAGCACTGAACACGGACCCCATCTACTACTGTGT<br>CTACTATGATTACGACCACAGTGATATATCCAGCAAC<br>AAAAACCCA   |  |
| V <sub>H</sub> 7183.4.6-<br>DSP2-R1 (R) | TGGGTTTTTGTGCTGGATATATCACTGTGGTCGTAAT<br>CATAGTAGACACAGTAGTAGATGGGGTCCGTGTTTCAG<br>TGCTCATCACTGAATGTGAGGAACTCGAATCCAGGAC<br>CGGCCTCC   |  |
| V <sub>H</sub> 7183.4.6-<br>DQ52-F2     | GGAGGCCGGTCCTGGATTCGAGTTCCTCACATTCAGT<br>GATGAGCACTGAACACGGACCCCTCCCAATCTGCCA<br>GTCATCTCTTGAGTCAGGGACCAATGATTTCTCTCAAA<br>ACAGTCGC    |  |
| V <sub>H</sub> 7183.4.6-<br>DQ52-F2 (R) | GCGACTGTTTTGAGAGAAATCATTGGTCCCTGACTCA<br>AGAGATGACTGGCAGATTGGGGAGGGGTCCGTGTTCA<br>GTGCTCATCACTGAATGTGAGGAACTCGAATCCAGGA<br>CCGGCCTCC   |  |
| V <sub>H</sub> 7183.4.6-<br>DQ52-R1     | GGAGGCCGGTCCTGGATTCGAGTTCCTCACATTCAGT<br>GATGAGCACTGAACACGGACCCCTGTGGACAGGTCT<br>TAGATGGGGAAAGAATGAGCAAATGCAAGCATCAGA<br>AGGGTGGATG    |  |
| Deep sequencing for recombination       |                                                                                                                                        |  |
| RAG2 <sup>-/-</sup> rep1<br>(DQ52 bait) | ACACTCTTCCCTACACGACGCTCTTCCGATCTCGCAT<br>TAACTAGTGTGAGGTTTAAAGCCT                                                                      |  |

|                                            |                                                                     |  |
|--------------------------------------------|---------------------------------------------------------------------|--|
| RAG2 <sup>-/-</sup> rep2<br>(DQ52 bait)    | ACACTCTTTCCCTACACGACGCTCTTCCGATCTCTTCG<br>CGCCTAGTGTGAGGTTTAAGCCT   |  |
| CBE <sup>-/-</sup> (1) rep1<br>(DQ52 bait) | ACACTCTTTCCCTACACGACGCTCTTCCGATCTAACAC<br>CTACTAGTGTGAGGTTTAAGCCT   |  |
| CBE <sup>-/-</sup> (1) rep2<br>(DQ52 bait) | ACACTCTTTCCCTACACGACGCTCTTCCGATCTACTAA<br>CTGCTAGTGTGAGGTTTAAGCCT   |  |
| CBE <sup>-/-</sup> (2) rep1<br>(DQ52 bait) | ACACTCTTTCCCTACACGACGCTCTTCCGATCTATCGC<br>CAGCTAGTGTGAGGTTTAAGCCT   |  |
| CBE <sup>-/-</sup> (2) rep2<br>(DQ52 bait) | ACACTCTTTCCCTACACGACGCTCTTCCGATCTCATTC<br>CAACTAGTGTGAGGTTTAAGCCT   |  |
| RAG2 <sup>-/-</sup> rep1<br>(DSP2 bait)    | ACACTCTTTCCCTACACGACGCTCTTCCGATCTCGAAC<br>TGTCCCCTGACACTCTGCACTGCTA |  |
| RAG2 <sup>-/-</sup> rep2<br>(DSP2 bait)    | ACACTCTTTCCCTACACGACGCTCTTCCGATCTCTCTG<br>TCTCCCCTGACACTCTGCACTGCTA |  |
| CBE <sup>-/-</sup> (1) rep1<br>(DQ52 bait) | ACACTCTTTCCCTACACGACGCTCTTCCGATCTCTTAA<br>GATCCCCTGACACTCTGCACTGCTA |  |
| CBE <sup>-/-</sup> (1) rep2<br>(DSP2 bait) | ACACTCTTTCCCTACACGACGCTCTTCCGATCTGCAAG<br>TAGCCCCTGACACTCTGCACTGCTA |  |
| CBE <sup>-/-</sup> (2) rep1<br>(DSP2 bait) | ACACTCTTTCCCTACACGACGCTCTTCCGATCTATATA<br>GGACCCCTGACACTCTGCACTGCTA |  |
| CBE <sup>-/-</sup> (2) rep2<br>(DSP2 bait) | ACACTCTTTCCCTACACGACGCTCTTCCGATCTCACGT<br>GTTCCCCTGACACTCTGCACTGCTA |  |
| Bio-DQ52                                   | /5BiosG/GATCAGAATACCCATACTCT                                        |  |
| Bio-DSP2                                   | /5BiosG/TGGGGAGATAGAATCCCAGGAG                                      |  |
